# Supplementary material for: Predicting effective drug combinations using gradient tree boosting based on features extracted from drug-protein heterogeneous network
Source: PubMed Central journal article supplement (PMC6902475; doi:10.1186/s12859-019-3288-1), 2019-12-09
Supplement: 12859_2019_3288_MOESM1_ESM.pdf [file 12859_2019_3288_MOESM1_ESM.pdf]

# Supplementary files

November 2019

## 1 supplementary tables

Table S1: Impact of the restart probability  $\alpha$  on the performance of GTB classifier.

| $\alpha$ | Precision | Recall | F-measure | MCC   | AUC   |
|----------|-----------|--------|-----------|-------|-------|
| 0.2      | 0.883     | 0.871  | 0.877     | 0.755 | 0.941 |
| 0.4      | 0.880     | 0.848  | 0.864     | 0.734 | 0.937 |
| 0.6      | 0.878     | 0.852  | 0.864     | 0.734 | 0.941 |
| 0.8      | 0.872     | 0.848  | 0.858     | 0.731 | 0.938 |

Table S2: impact of the tradeoff parameter  $\eta$  on the performance of GTB classifier.

| $\eta$ | Precision | Recall | F-measure | MCC   | AUC   |
|--------|-----------|--------|-----------|-------|-------|
| 0.1    | 0.849     | 0.831  | 0.839     | 0.683 | 0.920 |
| 0.2    | 0.856     | 0.860  | 0.858     | 0.711 | 0.930 |
| 0.3    | 0.882     | 0.858  | 0.870     | 0.743 | 0.939 |
| 0.4    | 0.885     | 0.861  | 0.873     | 0.749 | 0.941 |
| 0.5    | 0.887     | 0.867  | 0.876     | 0.757 | 0.945 |
| 0.6    | 0.886     | 0.864  | 0.874     | 0.753 | 0.945 |
| 0.7    | 0.894     | 0.871  | 0.882     | 0.767 | 0.945 |
| 0.8    | 0.896     | 0.872  | 0.883     | 0.769 | 0.948 |
| 0.9    | 0.897     | 0.872  | 0.884     | 0.772 | 0.949 |

Table S3: Impact of significant parameters involved in GTB classifier

| n-estimators  | Precision | Recall | F-measure | MCC   | AUC   |
|---------------|-----------|--------|-----------|-------|-------|
| 300           | 0.890     | 0.864  | 0.876     | 0.758 | 0.941 |
| 350           | 0.890     | 0.863  | 0.876     | 0.757 | 0.941 |
| 400           | 0.890     | 0.864  | 0.876     | 0.758 | 0.941 |
| 450           | 0.890     | 0.864  | 0.876     | 0.758 | 0.940 |
| 500           | 0.890     | 0.863  | 0.876     | 0.757 | 0.940 |
| 550           | 0.889     | 0.864  | 0.876     | 0.757 | 0.940 |
| 600           | 0.889     | 0.863  | 0.875     | 0.755 | 0.940 |
| 650           | 0.889     | 0.862  | 0.875     | 0.755 | 0.940 |
| 700           | 0.889     | 0.862  | 0.875     | 0.755 | 0.940 |
| 750           | 0.888     | 0.862  | 0.874     | 0.754 | 0.940 |
| 800           | 0.889     | 0.862  | 0.875     | 0.755 | 0.940 |
| max-depth     | Precision | Recall | F-measure | MCC   | AUC   |
| 6             | 0.865     | 0.856  | 0.860     | 0.723 | 0.932 |
| 8             | 0.866     | 0.858  | 0.862     | 0.726 | 0.938 |
| 10            | 0.875     | 0.861  | 0.868     | 0.738 | 0.936 |
| 12            | 0.872     | 0.851  | 0.861     | 0.728 | 0.936 |
| 13            | 0.877     | 0.844  | 0.860     | 0.726 | 0.940 |
| 14            | 0.875     | 0.858  | 0.866     | 0.735 | 0.936 |
| 16            | 0.874     | 0.846  | 0.860     | 0.725 | 0.936 |
| learning rate | Precision | Recall | F-measure | MCC   | AUC   |
| 0.2           | 0.883     | 0.871  | 0.877     | 0.755 | 0.941 |
| 0.3           | 0.881     | 0.861  | 0.871     | 0.744 | 0.937 |
| 0.4           | 0.864     | 0.868  | 0.865     | 0.730 | 0.939 |
| 0.5           | 0.838     | 0.859  | 0.848     | 0.691 | 0.878 |
| 0.6           | 0.799     | 0.846  | 0.821     | 0.631 | 0.826 |
| 0.7           | 0.752     | 0.799  | 0.771     | 0.537 | 0.759 |

Table S4: Parameter tuning for KNN

| <b>KNN</b>    |           |          |          |          |          |
|---------------|-----------|----------|----------|----------|----------|
| K             | precision | recall   | F1       | MCC      | AUC      |
| 3             | 0.69526   | 0.864957 | 0.770632 | 0.500551 | 0.742837 |
| 5             | 0.695414  | 0.865647 | 0.771005 | 0.501403 | 0.743182 |
| 7             | 0.66025   | 0.927259 | 0.771084 | 0.492059 | 0.725181 |
| 9             | 0.656424  | 0.93394  | 0.770673 | 0.491322 | 0.722833 |
| Distance      | precision | recall   | F1       | MCC      | AUC      |
| Manhattan     | 0.675414  | 0.844567 | 0.742650 | 0.480903 | 0.725682 |
| Euclidean     | 0.695414  | 0.865647 | 0.771005 | 0.501403 | 0.743182 |
| Chebyshe(q=3) | 0.721     | 0.851027 | 0.780432 | 0.530097 | 0.760874 |
| Chebyshe(q=4) | 0.728414  | 0.841339 | 0.780661 | 0.533513 | 0.763637 |
| Chebyshe(q=5) | 0.732631  | 0.83691  | 0.781159 | 0.536166 | 0.765461 |
| Chebyshe(q=6) | 0.733131  | 0.834911 | 0.780528 | 0.535319 | 0.765234 |

Table S5: Parameter tuning for Random Forest

| <b>Random Forest</b> |           |          |          |          |          |
|----------------------|-----------|----------|----------|----------|----------|
| Tree Num             | precision | recall   | F1       | MCC      | AUC      |
| 60                   | 0.880337  | 0.839637 | 0.85918  | 0.727266 | 0.863251 |
| 80                   | 0.877415  | 0.837037 | 0.856283 | 0.721265 | 0.860427 |
| 100                  | 0.879003  | 0.840431 | 0.858971 | 0.725813 | 0.862573 |
| 120                  | 0.882125  | 0.839844 | 0.860215 | 0.728883 | 0.864148 |
| 140                  | 0.884472  | 0.841041 | 0.862088 | 0.732982 | 0.866145 |
| 160                  | 0.881137  | 0.838986 | 0.859379 | 0.727349 | 0.863509 |
| 180                  | 0.88785   | 0.837201 | 0.861619 | 0.733214 | 0.865898 |
| 200                  | 0.881118  | 0.834948 | 0.857142 | 0.724482 | 0.861755 |
| 220                  | 0.886888  | 0.842952 | 0.864206 | 0.736943 | 0.86824  |
| 240                  | 0.878933  | 0.833276 | 0.85523  | 0.719422 | 0.859299 |
| 260                  | 0.884832  | 0.834803 | 0.858842 | 0.727749 | 0.863458 |
| 280                  | 0.885675  | 0.83638  | 0.860137 | 0.729878 | 0.86457  |
| 300                  | 0.882525  | 0.838894 | 0.85995  | 0.728831 | 0.864123 |
| 320                  | 0.884064  | 0.83708  | 0.859687 | 0.728392 | 0.863831 |
| 340                  | 0.889663  | 0.842084 | 0.865101 | 0.739263 | 0.869321 |
| 360                  | 0.889706  | 0.837384 | 0.862671 | 0.735566 | 0.867287 |
| 380                  | 0.885764  | 0.837483 | 0.860835 | 0.73108  | 0.865171 |
| 400                  | 0.888735  | 0.838411 | 0.862617 | 0.735136 | 0.867137 |
| 420                  | 0.885029  | 0.838305 | 0.860848 | 0.731161 | 0.865225 |
| 440                  | 0.889659  | 0.837057 | 0.862295 | 0.735397 | 0.867315 |
| 460                  | 0.888333  | 0.835735 | 0.860966 | 0.732353 | 0.865741 |
| 480                  | 0.88694   | 0.838226 | 0.861788 | 0.733284 | 0.866279 |
| 500                  | 0.887349  | 0.8397   | 0.862746 | 0.734731 | 0.866989 |

Table S6: Parameter tuning for SVM

| SVM  |           |          |          |          |          |
|------|-----------|----------|----------|----------|----------|
| c    | precision | recall   | F1       | MCC      | AUC      |
| 10   | 0.905743  | 0.781945 | 0.84675  | 0.725237 | 0.858374 |
| 210  | 0.905743  | 0.778312 | 0.845517 | 0.724475 | 0.857645 |
| 410  | 0.907429  | 0.778312 | 0.846225 | 0.726124 | 0.858349 |
| 610  | 0.907499  | 0.778978 | 0.846637 | 0.726769 | 0.858683 |
| 810  | 0.908381  | 0.779663 | 0.847428 | 0.728204 | 0.859375 |
| 1010 | 0.906703  | 0.779663 | 0.84672  | 0.726561 | 0.858673 |
| 1210 | 0.908394  | 0.779654 | 0.84742  | 0.728215 | 0.85937  |
| 1410 | 0.907499  | 0.778978 | 0.846637 | 0.726769 | 0.858683 |
| 1610 | 0.906588  | 0.778312 | 0.845877 | 0.725296 | 0.857997 |
| 1810 | 0.908249  | 0.778978 | 0.846961 | 0.72761  | 0.859083 |
| 2010 | 0.907338  | 0.778312 | 0.846177 | 0.726158 | 0.8584   |
| 2210 | 0.906658  | 0.778978 | 0.846289 | 0.72594  | 0.858331 |
| 2410 | 0.906584  | 0.778312 | 0.845865 | 0.725303 | 0.857997 |
| 2610 | 0.908178  | 0.778312 | 0.846549 | 0.726966 | 0.85875  |
| 2810 | 0.906584  | 0.778312 | 0.845865 | 0.725303 | 0.857997 |
| 3010 | 0.908381  | 0.779663 | 0.847428 | 0.728204 | 0.859375 |
| 3210 | 0.906588  | 0.778312 | 0.845877 | 0.725296 | 0.857997 |
| 3410 | 0.906584  | 0.778312 | 0.845865 | 0.725303 | 0.857997 |
| 3610 | 0.905743  | 0.778312 | 0.845517 | 0.724475 | 0.857645 |
| 3810 | 0.907338  | 0.778312 | 0.846177 | 0.726158 | 0.8584   |
| 4010 | 0.908381  | 0.779663 | 0.847428 | 0.728204 | 0.859375 |
| 4210 | 0.906588  | 0.778312 | 0.845877 | 0.725296 | 0.857997 |
| 4410 | 0.906755  | 0.779011 | 0.846341 | 0.725948 | 0.858311 |
| 4610 | 0.90665   | 0.778978 | 0.846289 | 0.725934 | 0.858328 |
| 4810 | 0.908178  | 0.778312 | 0.846549 | 0.726966 | 0.85875  |
| 5010 | 0.906655  | 0.778978 | 0.846277 | 0.725947 | 0.858331 |
| 5210 | 0.906588  | 0.778312 | 0.845877 | 0.725296 | 0.857997 |
| 5410 | 0.907429  | 0.778312 | 0.846225 | 0.726124 | 0.858349 |
| 5610 | 0.907429  | 0.778312 | 0.846225 | 0.726124 | 0.858349 |
| 5810 | 0.907412  | 0.778978 | 0.846601 | 0.726795 | 0.858734 |
| 6010 | 0.905883  | 0.779645 | 0.846338 | 0.725767 | 0.858312 |
| 6210 | 0.906658  | 0.778978 | 0.846289 | 0.72594  | 0.858331 |
| 6410 | 0.908265  | 0.778312 | 0.846585 | 0.726939 | 0.858699 |
| 6610 | 0.907509  | 0.779011 | 0.846653 | 0.726803 | 0.858715 |
| 6810 | 0.907429  | 0.778312 | 0.846225 | 0.726124 | 0.858349 |
| 7010 | 0.906584  | 0.778312 | 0.845865 | 0.725303 | 0.857997 |
| 7210 | 0.907429  | 0.778312 | 0.846225 | 0.726124 | 0.858349 |
| 7410 | 0.907429  | 0.778312 | 0.846225 | 0.726124 | 0.858349 |
| 7610 | 0.908183  | 0.778312 | 0.846537 | 0.726979 | 0.858753 |
| 7810 | 0.906588  | 0.778312 | 0.845877 | 0.725296 | 0.857997 |
| 8010 | 0.906588  | 0.778312 | 0.845877 | 0.725296 | 0.857997 |
| 8210 | 0.907409  | 0.778978 | 0.846589 | 0.726802 | 0.858734 |
| 8410 | 0.906703  | 0.779663 | 0.84672  | 0.726561 | 0.858673 |
| 8610 | 0.907424  | 0.778312 | 0.846237 | 0.726111 | 0.858347 |
| 8810 | 0.906774  | 0.78033  | 0.847132 | 0.727206 | 0.859006 |
| 9010 | 0.907429  | 0.778312 | 0.846225 | 0.726124 | 0.858349 |
| 9210 | 0.908265  | 0.778312 | 0.846585 | 0.726939 | 0.858699 |
| 9410 | 0.907412  | 0.778978 | 0.846601 | 0.726795 | 0.858734 |
| 9610 | 0.905743  | 0.778312 | 0.845517 | 0.724475 | 0.857645 |
| 9810 | 0.907496  | 0.779011 | 0.846659 | 0.726773 | 0.858699 |

Table S7: Parameter tuning for LogitBoost

| <b>LogitBoost</b> |           |          |          |          |          |
|-------------------|-----------|----------|----------|----------|----------|
| nIter             | precision | recall   | F1       | MCC      | AUC      |
| 5                 | 0.722204  | 0.722368 | 0.719373 | 0.445081 | 0.721663 |
| 10                | 0.802566  | 0.789531 | 0.793469 | 0.591569 | 0.794128 |
| 15                | 0.751433  | 0.733989 | 0.741509 | 0.490749 | 0.744135 |
| 20                | 0.79773   | 0.804827 | 0.800515 | 0.597528 | 0.798134 |
| 25                | 0.745207  | 0.775025 | 0.758554 | 0.511151 | 0.754275 |
| 30                | 0.791091  | 0.794428 | 0.792015 | 0.588161 | 0.79371  |
| 35                | 0.757278  | 0.762632 | 0.758929 | 0.518059 | 0.758518 |
| 40                | 0.796649  | 0.802683 | 0.799117 | 0.593772 | 0.796285 |
| 45                | 0.763947  | 0.783625 | 0.77288  | 0.541569 | 0.77026  |
| 50                | 0.796171  | 0.804483 | 0.799748 | 0.593436 | 0.796372 |
| 55                | 0.781941  | 0.780456 | 0.780172 | 0.562078 | 0.780679 |
| 60                | 0.803458  | 0.808416 | 0.805302 | 0.603255 | 0.801584 |
| 65                | 0.777474  | 0.783504 | 0.779973 | 0.559652 | 0.779746 |
| 70                | 0.803111  | 0.820192 | 0.810943 | 0.617113 | 0.808352 |
| 75                | 0.773724  | 0.798598 | 0.785273 | 0.565455 | 0.782363 |
| 80                | 0.799281  | 0.821191 | 0.8096   | 0.611602 | 0.805326 |
| 85                | 0.774445  | 0.797582 | 0.785405 | 0.564571 | 0.781877 |
| 90                | 0.801372  | 0.822064 | 0.811251 | 0.614073 | 0.806778 |
| 95                | 0.770648  | 0.801396 | 0.785296 | 0.562493 | 0.780777 |
| 100               | 0.800013  | 0.820912 | 0.809765 | 0.612427 | 0.805774 |

Table S8: Parameter tuning for AdaBoost

| <b>AdaBoost</b> |           |          |          |          |          |
|-----------------|-----------|----------|----------|----------|----------|
| nIter           | precision | recall   | F1       | MCC      | AUC      |
| 5               | 0.806963  | 0.802859 | 0.804363 | 0.611474 | 0.805868 |
| 15              | 0.839297  | 0.843393 | 0.840755 | 0.682227 | 0.841135 |
| 25              | 0.855255  | 0.845808 | 0.849706 | 0.703949 | 0.851622 |
| 35              | 0.863191  | 0.859599 | 0.860791 | 0.724326 | 0.862055 |
| 45              | 0.857132  | 0.84984  | 0.85295  | 0.708447 | 0.853805 |
| 55              | 0.871861  | 0.851836 | 0.861457 | 0.727648 | 0.863981 |
| 65              | 0.867665  | 0.854387 | 0.860503 | 0.724253 | 0.862279 |
| 75              | 0.870735  | 0.859972 | 0.865008 | 0.732736 | 0.86646  |
| 85              | 0.872824  | 0.854393 | 0.863167 | 0.732062 | 0.866077 |
| 95              | 0.868813  | 0.854495 | 0.861443 | 0.731843 | 0.861036 |
